# Supplementary material
Source: Springer Nature journal article supplement (https://www.springermedizin.de/resource/supplementary/12885_2009_1974_MOESM11_ESM.pdf/9460220)

**A**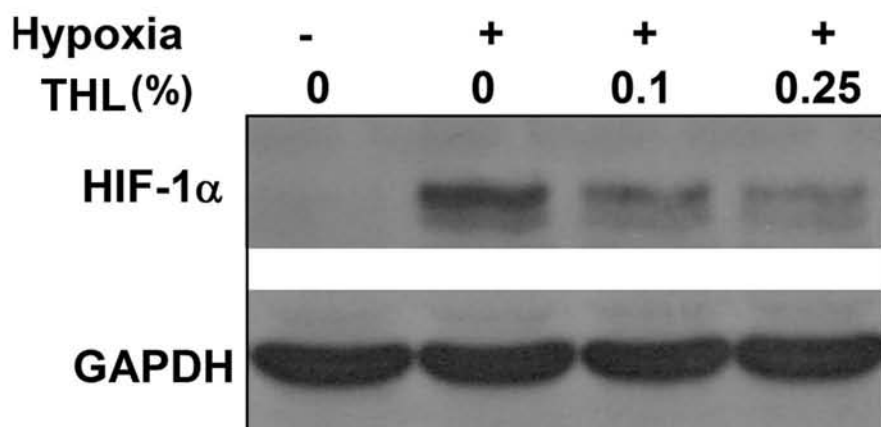**B**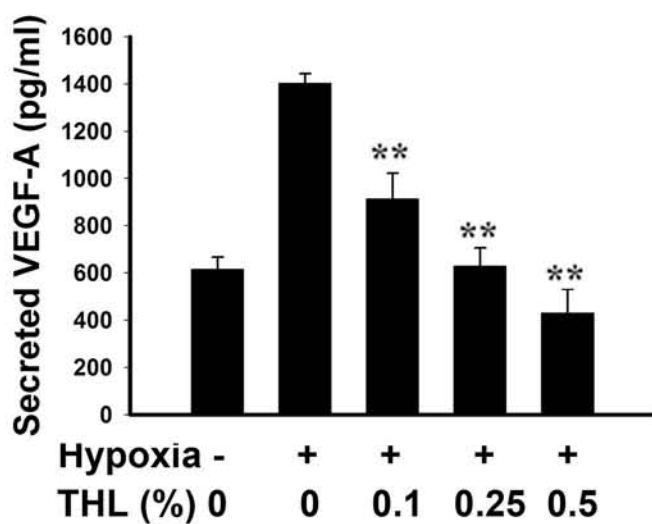**C**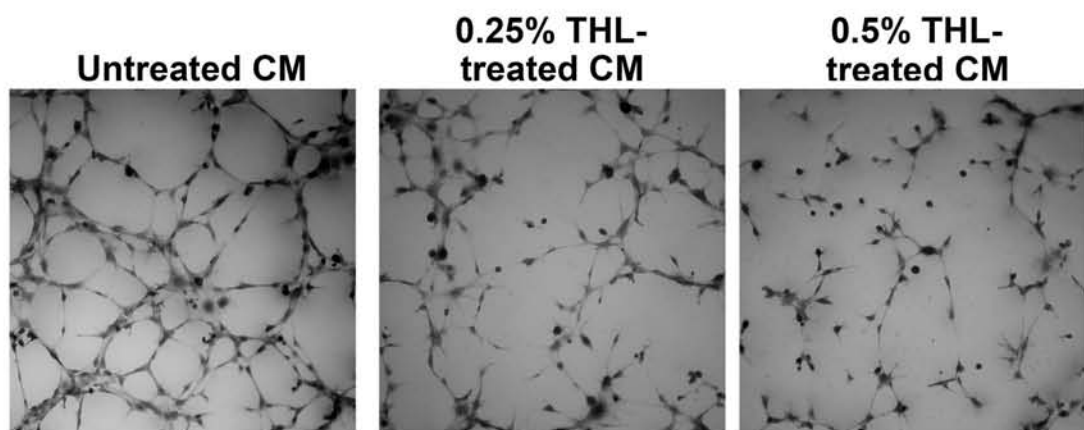

Supplement: MOESM11 [file 9460220]
